# Supplementary material for: Self-supported tripod-like nickel phosphide nanowire arrays for hydrogen evolution
Source: Royal Society of Chemistry journal article supplement (doi:10.1039/c9ta07859b), 2019-01-01
Supplement: c9ta07859b1.pdf [file c9ta07859b1.pdf]

## Electronic Supplementary Information

# Self-supported tripod-like nickel phosphide nanowire arrays for hydrogen evolution

Yue Wang,<sup>a,b</sup> Lina Liu,<sup>a</sup> Xiao Zhang,<sup>a</sup> Feng Yan,<sup>a</sup> Chunling Zhu,<sup>b\*</sup> and Yujin Chen<sup>a\*</sup>

*a Key Laboratory of In-Fiber Integrated Optics, Ministry of Education, and College of Science, Harbin Engineering University, Harbin 150001, China.*

*b College of Material Science and Chemical Engineering, Harbin Engineering University, Harbin 150001, China.*

\*Corresponding authors.

E-mail addresses: chen yujin@hrbeu.edu.cn, zhuchunling@hrbeu.edu.cn

# EXPERIMENTAL SECTION

## 1. Materials and Methods.

Nickel acetate, ammonium molybdate, potassium hydroxide, concentrated hydrochloric acid, and ethanol were purchased from Tianjin Guangfu Fine Chemical Research Institute (China). Sodium hypophosphite was purchased from Tianjin Tianli Chemical Reagent Co., Ltd. Ni foam was purchased from Kunshan Yiersheng International Trade Co. Ltd (Kunshan, China). Commercial IrO<sub>2</sub> and 20 wt% Pt/C catalysts were purchased from Macklin Biochemical Co., Ltd (Shanghai, China). All chemicals were used as received and all aqueous solutions were prepared using ultrapure water (>18.2 MΩ).

## 2. Synthesis of Ni<sub>x</sub>P

The NiMoO<sub>4</sub>·xH<sub>2</sub>O nanowires were synthesized on NF according to the previously reported method.<sup>51</sup> The Ni(OH)<sub>2</sub>-NiOOH/NF tripod-like nanostructure was made by leaching the Mo from surface of NiMoO<sub>4</sub>·xH<sub>2</sub>O nanowires through electrochemical oxidation at 1.59 V versus reversible hydrogen electrode (RHE) for about 20 min in 1.0 M KOH. The Ni<sub>x</sub>P catalyst was synthesized by one-step phosphorization. The precursor of NaH<sub>2</sub>PO<sub>2</sub> powder was placed at the upstream during the phosphorization, and a small piece of Ni(OH)<sub>2</sub>-NiOOH on Ni foam (~ 2.2 cm×2.6 cm) was placed at the middle of tube furnace at a Ar gas flow. The pyrolysis treatment performed at 300, 400, and 500 °C for 1 h were denoted as Ni<sub>x</sub>P-300, Ni<sub>x</sub>P-400 and Ni<sub>x</sub>P-500, respectively.

## 3. Synthesis of NiMoO<sub>4</sub>-P

To prepare NiMoO<sub>4</sub>-P NWs, the NiMoO<sub>4</sub>/NF and NaH<sub>2</sub>PO<sub>2</sub> were put at two separate positions in the porcelain boat with NaH<sub>2</sub>PO<sub>2</sub> of 500 mg at the upstream side of the tube furnace. And then heat treated at 600 °C for 2 h at the Ar atmosphere.

## 4. Synthesis of Ni(OH)<sub>2</sub>-P/NF

The Ni(OH)<sub>2</sub> nanosheets were prepared by one step hydrothermal reaction according to a previous report.<sup>52</sup> Then the synthesis procedure of Ni(OH)<sub>2</sub>-P is similar to that of Ni<sub>x</sub>P-400, expect that replaced Ni(OH)<sub>2</sub>-NiOOH/NF with Ni(OH)<sub>2</sub>/NF.

## 5. Synthesis of NF-P

For comparison, the NF-P was directly synthesized according to the method of the Ni<sub>x</sub>P-400, expect that replaced Ni(OH)<sub>2</sub>-NiOOH/NF with the bare Ni foam.

## 6. Synthesis of FeNi(OH)<sub>x</sub>/NF

The FeNi(OH)<sub>x</sub>/NF was synthesized on NF according to the method previously reported by our group.<sup>53</sup>

## 7. Structure characterization

The powder X-ray diffraction (XRD) patterns were recorded on a Panalytical X-pert diffractometer with Cu K $\alpha$  radiation ( $\lambda=1.5418$  Å). The morphology and composition of the electrocatalysts were analyzed by scanning electron microscopy (SEM) (Hitachi SU70), and transmission electron microscopy (TEM) (FEI Tecnai-F20 transmission electron microscope). XPS analyses were acquired by using X-ray Photoelectron Spectroscopy (XPS, Themofisher Scientific Company) with Al K $\alpha$  radiation.

## 8. Electrochemical Measurements

The HER activity was performed with a CHI760E electrochemical workstation in the 1.0 M KOH aqueous electrolyte with a standard three-electrode electrochemical cell. It is important to mention that the 3D self-supported Ni<sub>x</sub>P and NiMoO<sub>4</sub>-P catalysts, without any binder or conductive agent, were directly used as working electrodes. The area of the working electrodes immersed into the electrolyte was controlled to be 1 cm<sup>2</sup>. A saturated Ag/AgCl electrode was used as the reference electrode and a graphite rod was used as the counter electrode. 20wt% Pt/C and IrO<sub>2</sub> electrodes were prepared as follows: The catalyst powder was dispersed in N-methyl-2-pyrrolidone solvent containing 7.5 wt% PVDF under constant stirring. The weight ratio of the catalyst to PVDF was 8:1. Then the mixture was coated onto a piece of Ni foam. The amount of the catalysts on the Ni foam was about 1.5 mg cm<sup>-2</sup>. All the measurements were carried out at ambient temperature. The HER activities of the self-supported electrodes were evaluated by comparing the polarization curves obtained using linear sweep voltammetry (LSV) at a scan rate of 5 mV s<sup>-1</sup>. Tafel analyses were carried out according to the following Tafel equation:  $\eta = a + b \log|j|$ , where  $a$  is a constant,  $b$  is the Tafel slope and  $j$  is the current density. Double-layer capacitance ( $C_{dl}$ ) data were collected via the cyclic voltammetry curves measured, the potentials were between 0.2 and 0.3 V vs. RHE, and the scanning rates were from 100 to 300 mV s<sup>-1</sup>. Electrochemical impedance spectroscopy (EIS) measurements were performed by

applying an AC voltage with 5 mV amplitude in a frequency range from 0.01 Hz to 100 kHz. The chronopotentiometric measurements were used to assess the long-term stability of the electrocatalysts. All potentials measured were calibrated to reversible hydrogen electrode (RHE) using the following equation:  $E_{\text{RHE}} = E_{\text{Ag/AgCl}}^0 + 0.21 + 0.059 \times \text{pH}$ . All LSV curves reported in this work are corrected by  $iR$  loss according to the following formula:  $E_{\text{compensated}} = E_{\text{measured}} - iR$ , where  $E_{\text{compensated}}$  is the compensated potential,  $E_{\text{measured}}$  the measured potentials and  $R$  the equivalent series resistance that was determined by the current interrupt technique.

The electrochemical performance of the overall water splitting system assembled with  $\text{FeNi}(\text{OH})_x/\text{NF}$  as anode and  $\text{Ni}_x\text{P-400}$  as cathode was evaluated in 1.0 M KOH through LSV at a scan rate of  $5 \text{ mV s}^{-1}$ . For comparison, the electrochemical performance of the electrolyzer assembled with Pt/C and  $\text{IrO}_2$  was also measured under the same conditions.

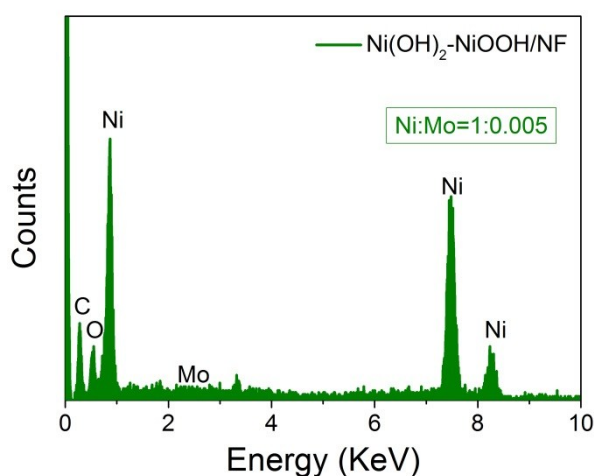

Fig. S1 SEM-EDS spectrum of  $\text{Ni}(\text{OH})_2\text{-NiOOH/NF}$ .

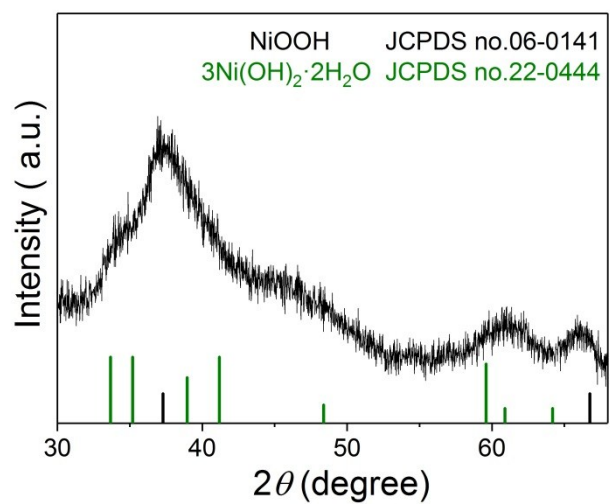

Fig. S2 XRD pattern of Ni(OH)<sub>2</sub>-NiOOH NWs.

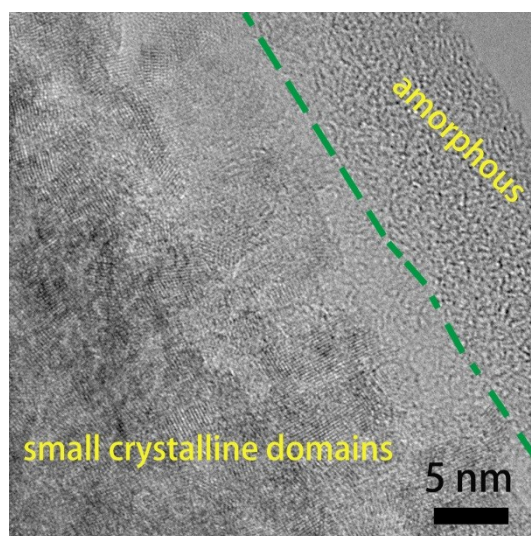

Fig. S3 HRTEM image of Ni(OH)<sub>2</sub>-NiOOH NW.

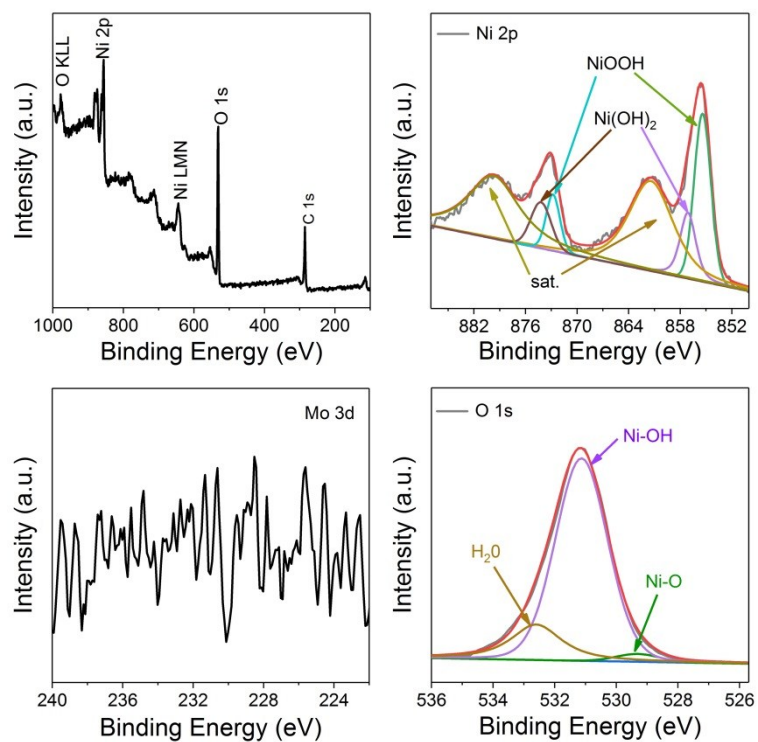

Fig. S4 XPS spectra of a) survey scan, b) Ni 2p, c) Mo 3d, and d) O 1s for the Ni(OH)<sub>2</sub>-NiOOH NWs.

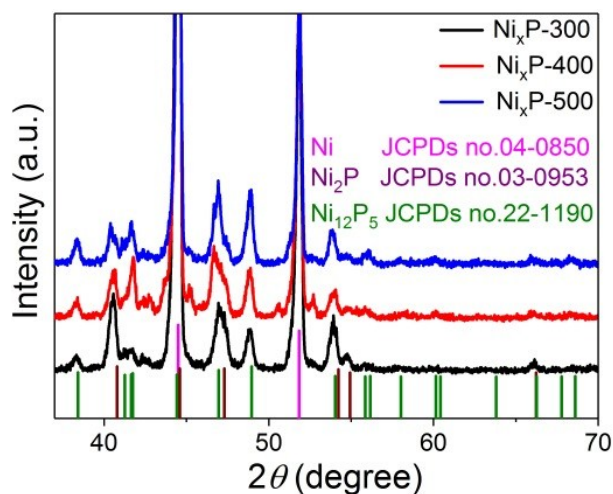

Fig. S5 XRD patterns of Ni<sub>x</sub>P-300/NF, Ni<sub>x</sub>P-400/NF, and Ni<sub>x</sub>P-500/NF.

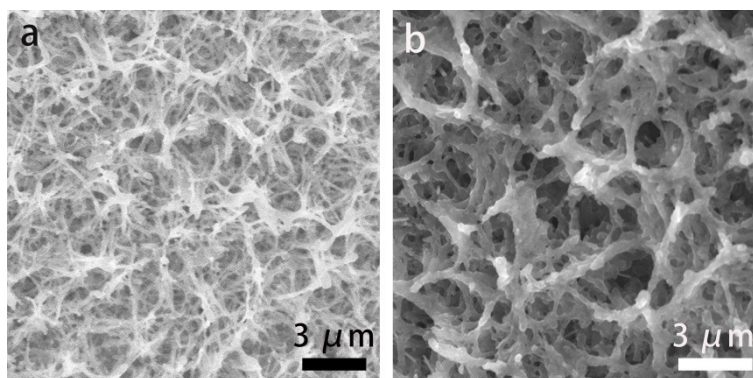

Fig. S6 SEM images of a) Ni<sub>x</sub>P-300/NF, and b) Ni<sub>x</sub>P-500/NF.

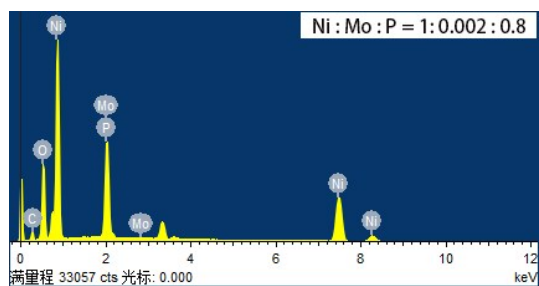

Fig. S7 SEM-EDS spectrum of  $\text{Ni}_x\text{P}/\text{NF}-400$ .

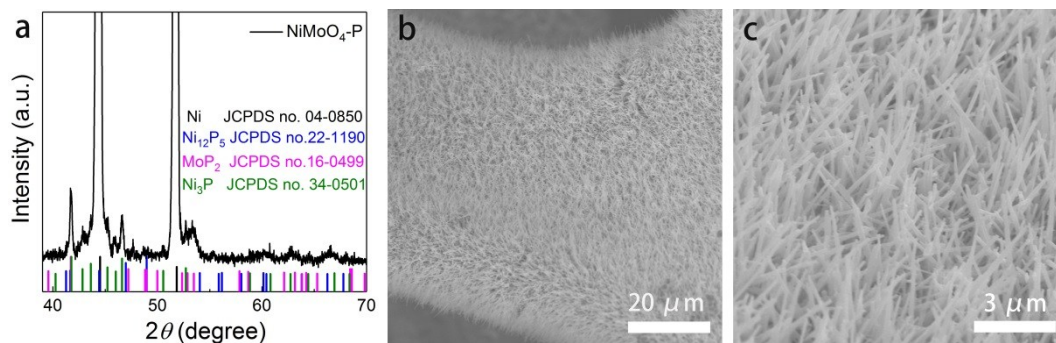

Fig. S8 a) XRD pattern of  $\text{NiMoO}_4\text{-P}/\text{NF}$ . b, c) SEM images of  $\text{NiMoO}_4\text{-P}/\text{NF}$ .

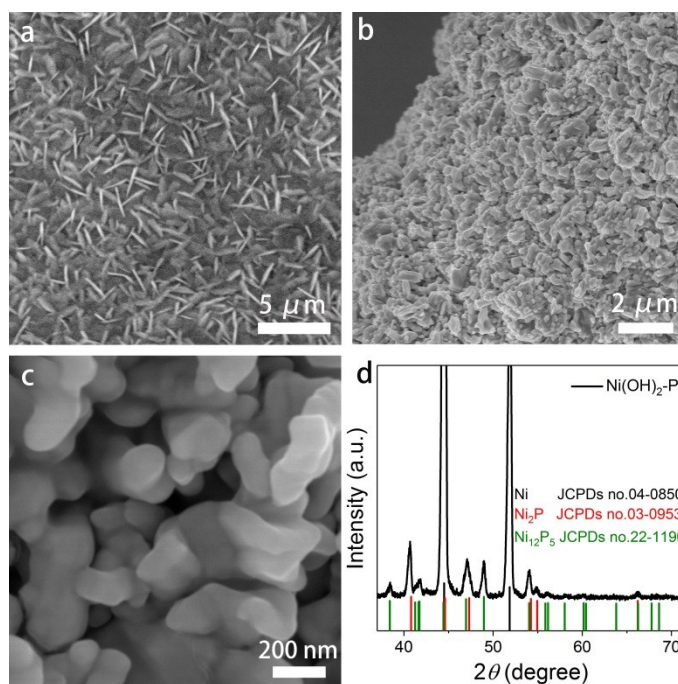

Fig. S9 a) SEM image of  $\text{Ni}(\text{OH})_2/\text{NF}$ . b, c) SEM images of the  $\text{Ni}(\text{OH})_2\text{-P}$ , and d) XRD pattern of  $\text{Ni}(\text{OH})_2\text{-P}$ .

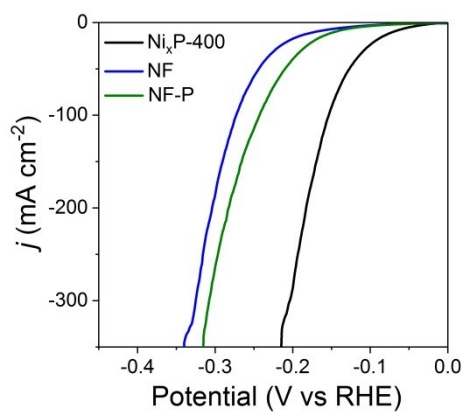

Fig. S10 LSVs of  $\text{Ni}_x\text{P-400}$  NWs, bare NF and NF-P catalysts.

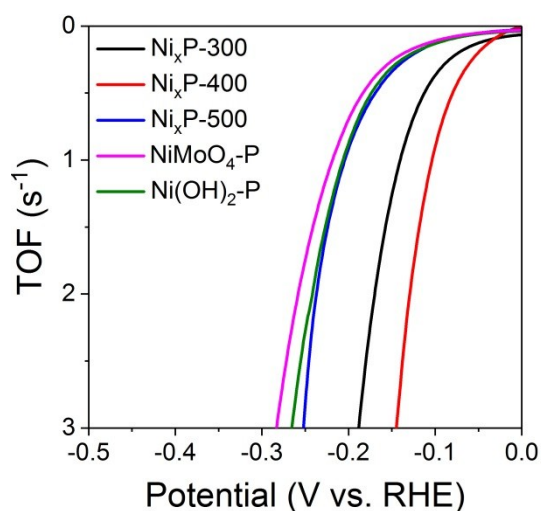

Fig. S11 Calculated turnover frequencies of the  $\text{Ni}_x\text{P-300}$ ,  $\text{Ni}_x\text{P-400}$ ,  $\text{Ni}_x\text{P-500}$ ,  $\text{NiMoO}_4\text{-P}$  and  $\text{Ni(OH)}_2\text{-P}$  electrodes in 1.0 M KOH for HER process.



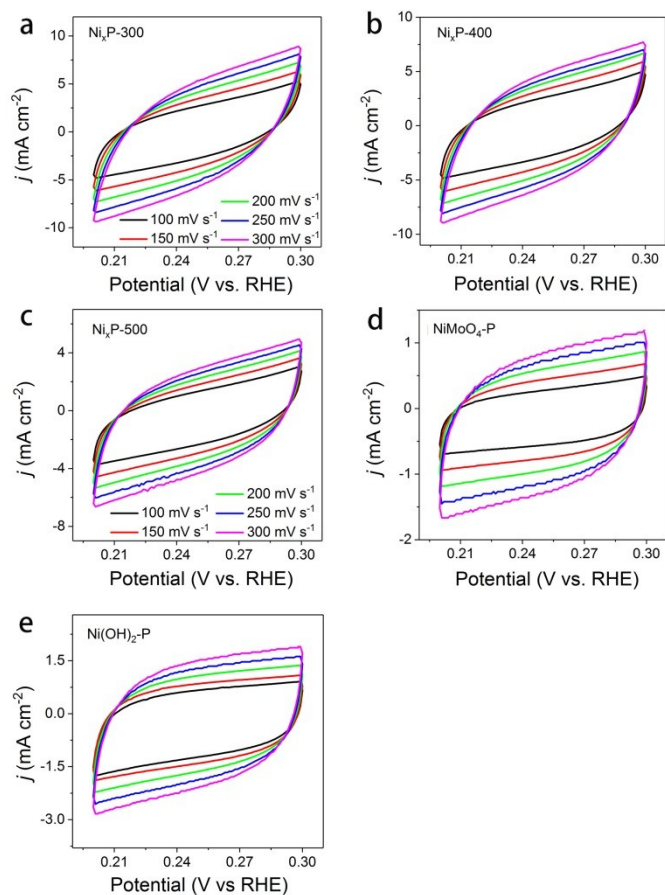

Fig. S12 CV curves for a)  $\text{Ni}_x\text{P-300}$ , b)  $\text{Ni}_x\text{P-400}$ , c)  $\text{Ni}_x\text{P-500}$ , d)  $\text{NiMoO}_4\text{-P}$  and e)  $\text{Ni(OH)}_2\text{-P}$  electrodes in the region of 0.2 and 0.3 V vs. RHE at different scan rates (100, 150, 200, 250 and  $300 \text{ mV s}^{-1}$ ).

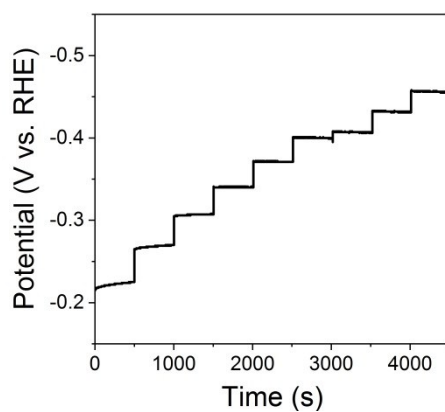

Fig. S13 The multi-step chronopotentiometric curve of the  $\text{Ni}_x\text{P-400}$  electrode towards the HER without  $iR$  corrections.

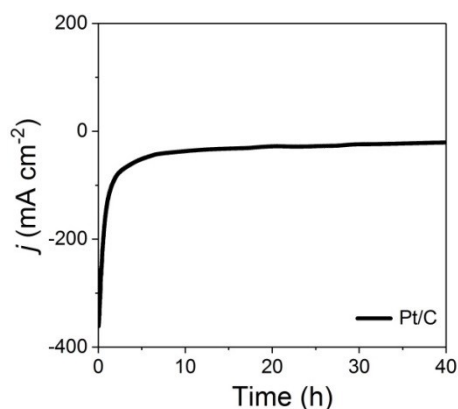

Fig. S14 The time-dependent current density curve of Pt/C for 40 h.

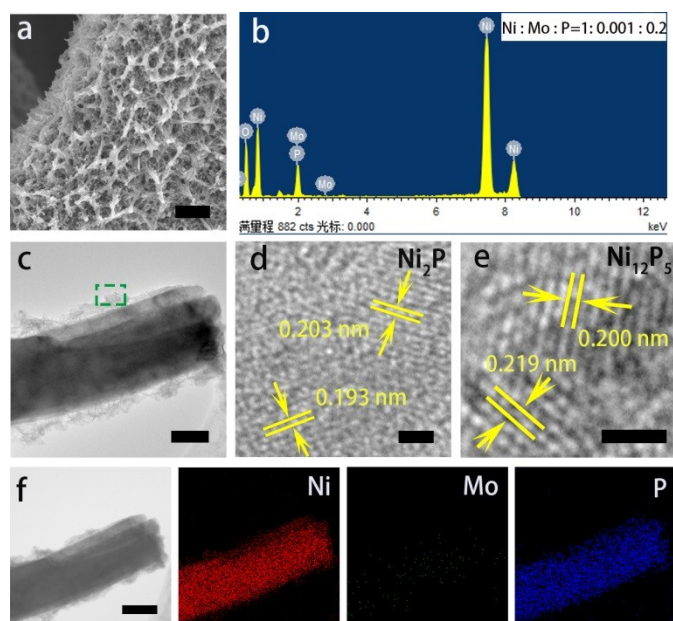

Fig. S15 a) SEM image, b) SEM-EDX spectrum of the  $\text{Ni}_x\text{P}$ -400/NF after HER stability test. The scale bars in a): 5  $\mu\text{m}$ . c) TEM image, d, e) HRTEM images from the selected part of the c), and f) STEM image and corresponding EDX elemental mapping images of  $\text{Ni}_x\text{P}$ -400 NWs after HER stability test. The scale bars in c): 50 nm, d): 1 nm, e): 1 nm, and f): 100 nm.

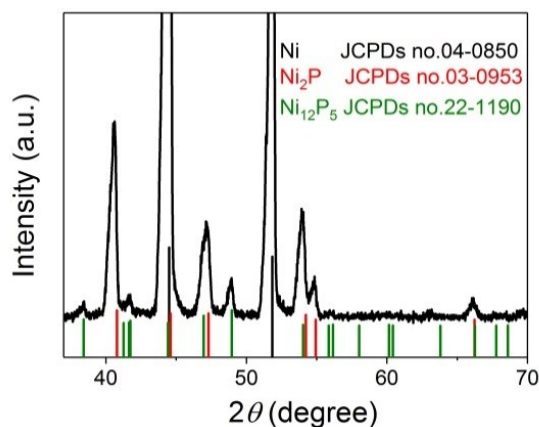

Fig. S16 XRD pattern of the  $\text{Ni}_x\text{P}$ -400/NF electrode after HER stability test.

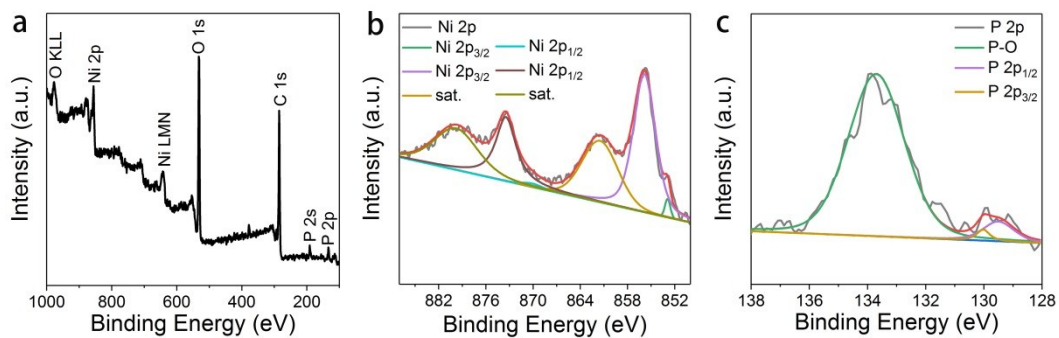

Fig. S17 XPS spectra of a) survey scan, b) Ni 2p, and c) P 2p for the  $\text{Ni}_x\text{P}$ -400 electrode after HER stability test.

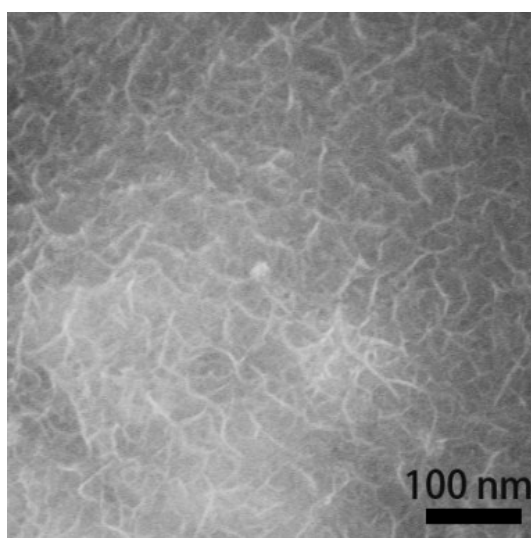

Fig. S18 SEM image of  $\text{FeNi(OH)}_x/\text{NF}$ .

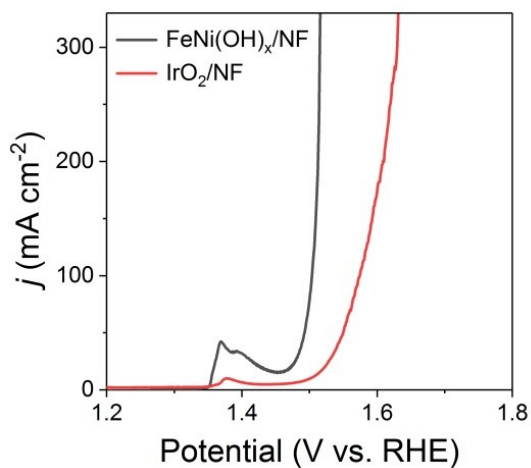

Figure S19. LSV curves of  $\text{FeNi(OH)}_x/\text{NF}$  and commercial  $\text{IrO}_2/\text{NF}$ .

Table S1. Comparison of HER activities of our self-supported tripod-like Ni<sub>x</sub>P/NF NWs with recent reported metal phosphides catalysts in 1.0 M KOH.

| Catalyst                                | $j$ (mA cm <sup>-2</sup> ) | $\eta$ (mV) | Reference                                                          |
|-----------------------------------------|----------------------------|-------------|--------------------------------------------------------------------|
| Ni <sub>x</sub> P-400                   | 10                         | 71          | This work                                                          |
|                                         | 20                         | 93          |                                                                    |
|                                         | 100                        | 153         |                                                                    |
| NiP <sub>2</sub> /NiO NRs               | 10                         | 131         | <i>ACS Appl. Mater. Interfaces</i> , 2018, <b>10</b> , 17896-17902 |
| Ni <sub>2(1-x)</sub> Mo <sub>2x</sub> P | 10                         | 72          | <i>Nano Energy</i> , 2018, <b>53</b> , 492-500                     |
|                                         | 100                        | 162         |                                                                    |
| Co-P film                               | 10                         | 94          | <i>Angew. Chem. Int. Ed.</i> , 2015, <b>54</b> , 6251-6254         |
|                                         | 20                         | 115         |                                                                    |
|                                         | 100                        | 158         |                                                                    |
| CoP/NPC/TF                              | 10                         | 80          | <i>Adv. Energy Mater.</i> , 2019, 1803970                          |
| Ni <sub>12</sub> P <sub>5</sub> /NF     | 10                         | 170         | <i>ACS Catal.</i> , 2017, <b>7</b> , 103-109                       |
|                                         | 20                         | 209         |                                                                    |
|                                         | 100                        | 290         |                                                                    |
| Ni <sub>2</sub> P/NF                    | 10                         | 85          | <i>ACS Catal.</i> , 2017, <b>7</b> , 103-109                       |
|                                         | 20                         | 133         |                                                                    |
|                                         | 100                        | 215         |                                                                    |
| Ni <sub>2</sub> P/CNFs                  | 10                         | 108         | <i>J. Mater. Chem. A</i> , 2019, <b>7</b> , 7451-7458              |
| NiMoP <sub>2</sub> NW/CC                | 100                        | 199         | <i>J. Mater. Chem. A</i> , 2017, <b>5</b> , 7191-7199              |
| Mo-Ni <sub>2</sub> P/NF                 | 10                         | 78          | <i>Nanoscale</i> , 2017, <b>9</b> , 16674-16679                    |
| Ni <sub>2</sub> P/Fe <sub>2</sub> P/NF  | 10                         | 115         | <i>J. Colloid Interface Sci.</i> , 2019, <b>541</b> , 279-286      |

|                                            |    |    |                                                            |
|--------------------------------------------|----|----|------------------------------------------------------------|
| $\text{Ni}_{0.51}\text{Co}_{0.49}\text{P}$ | 10 | 82 | <i>Adv. Funct. Mater.</i> ,<br>2016, <b>26</b> , 7644-7651 |
|--------------------------------------------|----|----|------------------------------------------------------------|

Table S2. Comparison of overall alkaline water splitting performance of our  $\text{Ni}_x\text{P-400/NF} \parallel \text{FeNi(OH)}_x/\text{NF}$  couples with recent reported metal phosphides catalysts.

| Catalyst                                                                       | $j$ (mA $\text{cm}^{-2}$ ) | Potential (V) | Reference                                                    |
|--------------------------------------------------------------------------------|----------------------------|---------------|--------------------------------------------------------------|
| $\text{Ni}_x\text{P-400/NF} \parallel \text{FeNi(OH)}_x/\text{NF}$             | 10                         | 1.53          | This work                                                    |
|                                                                                | 100                        | 1.62          |                                                              |
| $\text{Ni}_5\text{P}_4@\text{NiCo}_2\text{O}_4$                                | 100                        | 1.65          | <i>Adv. Energy Mater.</i> ,<br>2018, <b>8</b> , 1801690      |
| $\text{NiCoP/rGO} \parallel \text{NiCoP/rGO}$                                  | 10                         | 1.59          | <i>Adv. Funct. Mater.</i> ,<br>2016, <b>26</b> , 6785-6796   |
| $\text{Ni}_5\text{P}_4$                                                        | 10                         | Less than 1.7 | <i>Angew. Chem. Int. Ed.</i> , 2015, <b>54</b> , 12361-12365 |
| $\text{Ni}_{12}\text{P}_5$                                                     | 10                         | 1.64          | <i>ACS Catal.</i> , 2017, <b>7</b> , 103-109                 |
| $\text{Ni}_2\text{P}$                                                          | 10                         | 1.58          | <i>ACS Catal.</i> , 2017, <b>7</b> , 103-109                 |
| $\text{NiMoP}_2 \parallel \text{PE-NiMoP}_2$                                   | 10                         | 1.67          | <i>J. Mater. Chem. A</i> ,<br>2017, <b>5</b> , 7191-7199     |
| $\text{Ni}_{0.51}\text{Co}_{0.49}\text{P}$                                     | 10                         | 1.57          | <i>Adv. Funct. Mater.</i> ,<br>2016, <b>26</b> , 7644-7651   |
| $\text{NiFeO}_x/\text{NiFe-P}$                                                 | 20 (onset)                 | 1.6           | <i>Adv. Energy Mater.</i> ,<br>2017, <b>7</b> , 1700107      |
| $\text{Na}_{0.08}\text{Ni}_{0.9}\text{Fe}_{0.1}\text{O}_2$ and $\text{NiP(-)}$ | 10                         | 1.54          | <i>Energy Environ. Sci.</i> ,<br>2017, <b>10</b> , 121-128   |

S1. Y. Wang, Y. Sun, F. Yan, C. Zhu, P. Gao, X. Zhang and Y. Chen, *J. Mater. Chem. A.*, 2018, **6**, 8479-8487.

S2. W. Zhang, J. Qi, K. Q. Liu and R. Cao, *Adv. Energy Mater.*, 2016, **6**, 1502489.

S3. F. Yan, C. Zhu, C. Li, S. Zhang, X. Zhang and Y. Chen, *Electrochim. Acta*, 2017, **245**, 770-779.
